# Supplementary material for: Assistive and Rehabilitative Effects of the Playskin LiftTM Exoskeletal Garment on Reaching and Object Exploration in Children With Arthrogryposis
Source: Oxford University Press journal article supplement (doi:10.5014/ajot.2020.040972), 2020-12-07

**SUPPLEMENTARY MATERIALS**

**Table S1:** Statistical parameters (along with Cohen’s *d* effect sizes) from HLM for the ***assistive effects*** of the Playskin on the outcome variables at hip, chest, and eye level during the Baseline, Intervention, and Post-Intervention Phase; OFF = Playskin OFF condition; OFF/ON = difference between Playskin OFF and ON conditions; statistically significant *p* values in the comparison variable OFF/ON are marked in bold

|  | **BASELINE** | **INTERVENTION** | **POST-INTERVENTION** |
| --- | --- | --- | --- |
| ***Unimanual contact*** |  |  |  |
| Eyes | *OFF*: *β* = 15.61, *t*(16) = 3.39, *SE* = 4.61, *p* = .004  *OFF/ON*: *β* = 9.65, *t*(69) = 2.66, *SE* = 3.63, ***p* = .010**  *d* = 0.64 | *OFF*: *β* = 23.24, *t*(16) = 3.84, *SE* = 6.06, *p* = .001  *OFF/ON*: *β* = 6.42, *t*(16) = 1.30, *SE* = 4.92, *p* = .211  *d* = 0.65 | *OFF*: *β* = 30.91, *t*(10) = 4.15, *SE* = 7.45, *p* = .002  *OFF/ON*: *β* = 20.32, *t*(10) = 2.68, *SE* = 7.59, ***p* = .023**  *d* = 1.69 |
| Chest | *OFF*: *β* = 23.53, *t*(16) = 4.41, *SE* = 5.34, *p* < .001  *OFF/ON*: *β* = 25.39, *t*(16) = 3.85, *SE* = 6.60, ***p* = .001**  *d* = 1.93 | *OFF*: *β* = 29.93, *t*(16) = 5.84, *SE* = 5.13, *p* < .001  *OFF/ON*: *β* = 12.04, *t*(16) = 2.52, *SE* = 4.78, ***p* = .023**  *d* = 1.26 | *OFF*: *β* = 49.12, *t*(10) = 9.97, *SE* = 4.93, *p* < .001  *OFF/ON*: *β* = 4.99, *t*(72) = 1.13, *SE* = 4.43, *p* = .264  *d* = 0.27 |
| Hips | *OFF*: *β* = 35.52, *t*(16) = 6.53, *SE* = 5.44, *p* < .001  *OFF/ON*: *β* = 0.46, *t*(63) = 0.10, *SE* = 4.52, *p* = .919  *d* = 0.03 | *OFF*: *β* = 44.67, *t*(16) = 10.46, *SE* = 4.27, *p* < .001  *OFF/ON*: *β* = 4.93, *t*(252) = 1.80, *SE* = 2.73, *p* = .072  *d* = 0.23 | *OFF*: *β* = 53.50, *t*(10) = 9.79, *SE* = 5.47, *p* < .001  *OFF/ON*: *β* = 2.48, *t*(73) = 0.60, *SE* = 4.11, *p* = .548  *d* = 0.14 |
| ***Bimanual contact*** |  |  |  |
| Eyes | *OFF*: *β* = 3.75, *t*(16) = 1.46, *SE* = 2.58, *p* = .165  *OFF/ON*: *β* = 1.49, *t*(69) = 0.83, *SE* = 1.81, *p* = .412  *d* = 0.20 | *OFF*: *β* = 3.04, *t*(16) = 1.90, *SE* = 1.60, *p* = .076  *OFF/ON*: *β* = 1.19, *t*(253) = 1.05, *SE* = 1.13, *p* = .293  *d* = 0.13 | *OFF*: *β* = 5.84, *t*(10) = 1.94, *SE* = 3.00, *p* = .081  *OFF/ON*: *β* = 1.07, *t*(71) = 0.45, *SE* = 2.40, *p* = .656  *d* = 0.11 |
| Chest | *OFF*: *β* = 4.79, *t*(16) = 2.43, *SE* = 1.97, *p* = .027  *OFF/ON*: *β* = 2.52, *t*(67) = 0.88, *SE* = 2.86, *p* = .381  *d* = 0.22 | *OFF*: *β* = 7.67, *t*(16) = 2.55, *SE* = 3.00, *p* = .021  *OFF/ON*: *β* = 2.15, *t*(254) = 1.17, *SE* = 1.83, *p* = .242  *d* = 0.15 | *OFF*: *β* = 9.33, *t*(10) = 1.91, *SE* = 4.88, *p* = .085  *OFF/ON*: *β* = 8.29, *t*(72) = 2.07, *SE* = 4.00, ***p* = .042**  *d* = 0.49 |
| Hips | *OFF*: *β* = 15.57, *t*(16) = 3.44, *SE* = 4.53, *p* = .003  *OFF/ON*: *β* = 0.86, *t*(63) = 0.21, *SE* = 4.17, *p* = .838  *d* = 0.05 | *OFF*: *β* = 14.05, *t*(16) = 3.70, *SE* = 3.80, *p* = .002  *OFF/ON*: *β* = 2.29, *t*(252) = 0.94, *SE* = 2.43, *p* = .347  *d* = 0.12 | *OFF*: *β* = 23.47, *t*(10) = 3.28, *SE* = 7.15, *p* = .008  *OFF/ON*: *β* = 2.23, *t*(73) = 0.54, *SE* = 4.12, *p* = .591  *d* = 0.13 |
| ***Ventral contact*** |  |  |  |
| Eyes | *OFF*: *β* = 17.48, *t*(16) = 3.13, *SE* = 5.58, *p* = .006  *OFF/ON*: *β* = 7.53, *t*(69) = 1.64, *SE* = 4.60, *p* = .106  *d* = 0.39 | *OFF*: *β* = 23.64, *t*(16) = 3.78, *SE* = 6.26, *p* = .002  *OFF/ON*: *β* = 5.33, *t*(16) = 1.35, *SE* = 3.94, *p* = .195  *d* = 0.68 | *OFF*: *β* = 36.34, *t*(10) = 3.99, *SE* = 9.11, *p* = .003  *OFF/ON*: *β* = 15.02, *t*(10) = 2.05, *SE* = 7.32, *p* = .067  *d* = 1.30 |
| Chest | *OFF*: *β* = 25.60, *t*(16) = 4.35, *SE* = 5.89, *p* < .001  *OFF/ON*: *β* = 19.32, *t*(67) = 3.07, *SE* = 6.29, ***p* = .003**  *d* = 0.75 | *OFF*: *β* = 33.85, *t*(16) = 4.80, *SE* = 7.05, *p* < .001  *OFF/ON*: *β* = 13.37, *t*(16) = 2.64, *SE* = 5.07, ***p* = .018**  *d* = 1.32 | *OFF*: *β* = 54.00, *t*(10) = 8.14, *SE* = 6.64, *p* < .001  *OFF/ON*: *β* = 10.52, *t*(72) = 2.20, *SE* = 4.78, ***p* = .031**  *d* = 0.52 |
| Hips | *OFF*: *β* = 46.66, *t*(16) = 6.18, *SE* = 7.55, *p* < .001  *OFF/ON*: *β* = 2.29, *t*(63) = 0.46, *SE* = 4.95, *p* = .645  *d* = 0.12 | *OFF*: *β* = 51.31, *t*(16) = 8.08, *SE* = 6.35, *p* < .001  *OFF/ON*: *β* = 9.02, *t*(252) = 3.51, *SE* = 2.57, ***p* < .001**  *d* = 0.44 | *OFF*: *β* = 68.71, *t*(10) = 13.59, *SE* = 5.06, *p* < .001  *OFF/ON*: *β* = 7.84, *t*(73) = 1.98, *SE* = 3.96, *p* = .051  *d* = 0.46 |
| ***Open-handed contact*** | |  |  |
| Eyes | *OFF*: *β* = 19.00, *t*(16) = 3.10, *SE* = 6.12, *p* = .007  *OFF/ON*: *β* = 11.66, *t*(69) = 2.85, *SE* = 4.09, ***p* = .006**  *d* = 0.69 | *OFF*: *β* = 25.91, *t*(16) = 3.73, *SE* = 6.95, *p* = .002  *OFF/ON*: *β* = 7.65, *t*(16) = 1.49, *SE* = 5.13, *p* = .155  *d* = 0.75 | *OFF*: *β* = 36.92, *t*(10) = 3.98, *SE* = 9.28, *p* = .003  *OFF/ON*: *β* = 21.21, *t*(10) = 2.60, *SE* = 8.15, ***p* = .026**  *d* = 1.64 |
| Chest | *OFF*: *β* = 27.67, *t*(16) = 4.66, *SE* = 5.94, *p* < .001  *OFF/ON*: *β* = 29.22, *t*(67) = 4.64, *SE* = 6.30, ***p* < .001**  *d* = 1.13 | *OFF*: *β* = 37.30, *t*(16) = 5.47, *SE* = 6.81, *p* < .001  *OFF/ON*: *β* = 13.85, *t*(16) = 2.73, *SE* = 5.08, ***p* = .015**  *d* = 1.37 | *OFF*: *β* = 58.43, *t*(10) = 11.76, *SE* = 4.97, *p* < .001  *OFF/ON*: *β* = 13.28, *t*(72) = 3.13, *SE* = 4.24, ***p* = .003**  *d* = 0.74 |
| Hips | *OFF*: *β* = 51.04, *t*(16) = 6.85, *SE* = 7.45, *p* < .001  *OFF/ON*: *β* = 0.58, *t*(63) = 0.12, *SE* = 4.76, *p* = .903  *d* = 0.03 | *OFF*: *β* = 58.50, *t*(16) = 10.11, *SE* = 5.79, *p* < .001  *OFF/ON*: *β* = 7.13, *t*(252) = 2.91, *SE* = 2.45, ***p* = .004**  *d* = 0.37 | *OFF*: *β* = 76.96, *t*(10) = 17.43, *SE* = 4.42, *p* < .001  *OFF/ON*: *β* = 4.68, *t*(73) = 1.42, *SE* = 3.30, *p* = .160  *d* = 0.33 |
| ***Looking at the toy*** | |  |  |
| Eyes | *OFF*: *β* = 63.59, *t*(16) = 16.83, *SE* = 3.78, *p* < .001  *OFF/ON*: *β* = 9.04, *t*(69) = 1.68, *SE* = 5.38, *p* = .097  *d* = 0.40 | *OFF*: *β* = 61.22, *t*(16) = 15.97, *SE* = 3.83, *p* < .001  *OFF/ON*: *β* = 5.75, *t*(253) = 2.04, *SE* = 2.82, ***p* = .043**  *d* = 0.26 | *OFF*: *β* = 68.18, *t*(10) = 13.48, *SE* = 5.06, *p* < .001  *OFF/ON*: *β* = 11.12, *t*(71) = 2.68, *SE* = 4.15, ***p* = .009**  *d* = 0.64 |
| Chest | *OFF*: *β* = 66.00, *t*(16) = 17.65, *SE* = 3.74, *p* < .001  *OFF/ON*: *β* = 3.74, *t*(67) = 0.63, *SE* = 5.92, *p* = .529  *d* = 0.15 | *OFF*: *β* = 71.09, *t*(16) = 21.17, *SE* = 3.36, *p* < .001  *OFF/ON*: *β* = 2.52, *t*(254) = 0.91, *SE* = 2.76, *p* = .362  *d* = 0.11 | *OFF*: *β* = 79.06, *t*(82) = 27.57, *SE* = 2.87, *p* < .001  *OFF/ON*: *β* = -0.28, *t*(82) = -0.07, *SE* = 4.06, *p* = .945  *d* = 0.02 |
| Hips | *OFF*: *β* = 69.22, *t*(16) = 16.81, *SE* = 4.12, *p* < .001  *OFF/ON*: *β* = 2.30, *t*(63) = 0.36, *SE* = 6.42, *p* = .722  *d* = 0.09 | *OFF*: *β* = 74.16, *t*(16) = 24.60, *SE* = 3.01, *p* < .001  *OFF/ON*: *β* = 0.63, *t*(252) = 0.23, *SE* = 2.71, *p* = .817  *d* = 0.03 | *OFF*: *β* = 76.69, *t*(10) = 19.94, *SE* = 3.85, *p* < .001  *OFF/ON*: *β* = 0.42, *t*(73) = 0.10, *SE* = 4.24, *p* = .922  *d* = 0.02 |
| ***Looking during unimanual contact*** | |  |  |
| Eyes | *OFF*: *β* = 11.71, *t*(16) = 3.28, *SE* = 3.57, *p* = .005  *OFF/ON*: *β* = 8.48, *t*(69) = 2.71, *SE* = 3.13, ***p* = .008**  *d* = 0.65 | *OFF*: *β* = 17.09, *t*(16) = 3.57, *SE* = 4.78, *p* = .003  *OFF/ON*: *β* = 6.13, *t*(16) = 1.67, *SE* = 3.66, *p* = .114  *d* = 0.84 | *OFF*: *β* = 22.47, *t*(10) = 4.23, *SE* = 5.32, *p* = .002  *OFF/ON*: *β* = 20.07, *t*(10) = 2.67, *SE* = 7.51, ***p* = .023**  *d* = 1.69 |
| Chest | *OFF*: *β* = 17.83, *t*(16) = 3.95, *SE* = 4.51, *p* < .001  *OFF/ON*: *β* = 17.74, *t*(16) = 2.87, *SE* = 6.18, ***p* = .011**  *d* = 1.44 | *OFF*: *β* = 24.41, *t*(16) = 5.52, *SE* = 4.42, *p* < .001  *OFF/ON*: *β* = 9.60, *t*(16) = 2.57, *SE* = 3.74, ***p* = .021**  *d* = 1.29 | *OFF*: *β* = 39.91, *t*(10) = 8.59, *SE* = 4.65, *p* < .001  *OFF/ON*: *β* = 3.83, *t*(10) = 0.60, *SE* = 6.38, *p* = .561  *d* = 0.38 |
| Hips | *OFF*: *β* = 25.80, *t*(16) = 5.78, *SE* = 4.46, *p* < .001  *OFF/ON*: *β* = 5.35, *t*(63) = 1.14, *SE* = 4.69, *p* = .258  *d* = 0.29 | *OFF*: *β* = 35.86, *t*(16) = 9.91, *SE* = 3.62, *p* < .001  *OFF/ON*: *β* = 3.98, *t*(252) = 1.53, *SE* = 2.61, *p* = .128  *d* = 0.19 | *OFF*: *β* = 42.07, *t*(10) = 9.11, *SE* = 4.62, *p* < .001  *OFF/ON*: *β* = 0.34, *t*(73) = 0.09, *SE* = 3.88, *p* = .931  *d* = 0.02 |
| ***Looking during bimanual contact*** | |  |  |
| Eyes | *OFF*: *β* = 3.42, *t*(16) = 1.49, *SE* = 2.30, *p* =.157  *OFF/ON*: *β* = 1.33, *t*(69) = 0.75, *SE* = 1.77, *p* = .455  *d* = 0.18 | *OFF*: *β* = 2.21, *t*(16) = 1.84, *SE* = 1.20, *p* = .084  *OFF/ON*: *β* = 0.51, *t*(16) = 0.50, *SE* = 1.03, *p* = .626  *d* = 0.25 | *OFF*: *β* = 5.21, *t*(10) = 1.89, *SE* = 2.75, *p* = .088  *OFF/ON*: *β* = 0.95, *t*(71) = 0.39, *SE* = 2.44, *p* = .699  *d* = 0.09 |
| Chest | *OFF*: *β* = 2.94, *t*(16) = 2.19, *SE* = 1.34, *p* = .044  *OFF/ON*: *β* = 1.92, *t*(67) = 0.97, *SE* = 1.98, *p* = .366  *d* = 0.24 | *OFF*: *β* = 5.96, *t*(16) = 2.32, *SE* = 2.56, *p* = .034  *OFF/ON*: *β* = 1.90, *t*(254) = 1.24, *SE* = 1.53, *p* = .214  *d* = 0.16 | *OFF*: *β* = 7.78, *t*(10) = 1.75, *SE* = 4.45, *p* = .111  *OFF/ON*: *β* = 6.16, *t*(72) = 2.19, *SE* = 2.81, ***p* = .032**  *d* = 0.52 |
| Hips | *OFF*: *β* = 12.75, *t*(16) = 3.40, *SE* = 3.75, *p* = .004  *OFF/ON*: *β* = 1.30, *t*(63) = 0.35, *SE* = 3.68, *p* = .725  *d* = 0.09 | *OFF*: *β* = 11.23, *t*(16) = 3.50, *SE* = 3.21, *p* = .003  *OFF/ON*: *β* = 1.92, *t*(252) = 0.95, *SE* = 2.03, *p* = .345  *d* = 0.12 | *OFF*: *β* = 19.00, *t*(10) = 3.17, *SE* = 6.00, *p* = .010  *OFF/ON*: *β* = 2.88, *t*(73) = 0.80, *SE* = 3.63, *p* = .429  *d* = 0.19 |
| ***Bouts of exploration*** | |  |  |
| Eyes | *OFF*: *β* = 18.67, *t*(16) = 5.97, *SE* = 3.13, *p* < .001  *OFF/ON*: *β* = 11.37, *t*(69) = 2.58, *SE* = 4.40, ***p* = .012**  *d* = 0.65 | *OFF*: *β* = 21.10, *t*(16) = 6.61, *SE* = 3.19, *p* < .001  *OFF/ON*: *β* = 4.36, *t*(16) = 2.43, *SE* = 1.80, ***p* = .028**  *d* = 1.22 | *OFF*: *β* = 29.56, *t*(10) = 7.43, *SE* = 3.98, *p* < .001  *OFF/ON*: *β* = 5.11, *t*(71) = 2.11, *SE* = 2.42, ***p* = .038**  *d* = 0.50 |
| Chest | *OFF*: *β* = 22.69, *t*(16) = 6.96, *SE* = 3.26, *p* < .001  *OFF/ON*: *β* = 7.29, *t*(67) = 2.62, *SE* = 2.78, ***p* = .011**  *d* = 0.64 | *OFF*: *β* = 24.23, *t*(16) = 9.55, *SE* = 2.54, *p* < .001  *OFF/ON*: *β* = 2.82, *t*(254) = 1.97, *SE* = 1.43, ***p* = .050**  *d* = 0.25 | *OFF*: *β* = 36.18, *t*(10) = 8.63, *SE* = 4.19, *p* < .001  *OFF/ON*: *β* = -1.02, *t*(72) = -0.40, *SE* = 2.59, *p* = .693  *d* = 0.09 |
| Hips | *OFF*: *β* = 21.44, *t*(16) = 7.75, *SE* = 2.77, *p* < .001  *OFF/ON*: *β* = 6.00, *t*(63) = 1.99, *SE* = 3.01, *p* = .051  *d* = 0.50 | *OFF*: *β* = 25.65, *t*(16) = 10.83, *SE* = 2.37, *p* < .001  *OFF/ON*: *β* = 2.37, *t*(252) = 1.81, *SE* = 1.31, *p* = .072  *d* = 0.23 | *OFF*: *β* = 30.32, *t*(10) = 8.44, *SE* = 3.59, *p* < .001  *OFF/ON*: *β* = 3.90, *t*(73) = 1.78, *SE* = 2.19, *p* = .079 *d* = 0.42 |
| ***Combined behaviors*** | |  |  |
| Eyes | *OFF*: *β* = 18.88, *t*(16) = 3.84, *SE* = 4.91, *p* = .001  *OFF/ON*: *β* = 8.39, *t*(69) = 2.11, *SE* = 3.98, ***p* = .039**  *d* = 0.51 | *OFF*: *β* = 22.62, *t*(16) = 4.04, *SE* = 5.59, *p* < .001  *OFF/ON*: *β* = 8.46, *t*(16) = 2.14, *SE* = 3.95, ***p* = .048**  *d* = 1.07 | *OFF*: *β* = 30.35, *t*(10) = 4.34, *SE* = 6.99, *p* = .001  *OFF/ON*: *β* = 23.53, *t*(10) = 3.25, *SE* = 7.25, ***p* = .009**  *d* = 2.06 |
| Chest | *OFF*: *β* = 25.93, *t*(16) = 5.67, *SE* = 4.57, *p* < .001  *OFF/ON*: *β* = 17.22, *t*(67) = 3.03, *SE* = 5.69, ***p* = .004**  *d* = 0.74 | *OFF*: *β* = 34.50, *t*(16) = 6.03, *SE* = 5.72, *p* < .001  *OFF/ON*: *β* = 10.08, *t*(16) = 2.46, *SE* = 4.10, ***p* = .026**  *d* = 1.23 | *OFF*: *β* = 51.65, *t*(10) = 12.47, *SE* = 4.14, *p* < .001  *OFF/ON*: *β* = 12.11, *t*(72) = 2.70, *SE* = 4.49, ***p* = .009**  *d* = 0.64 |
| Hips | *OFF*: *β* = 42.27, *t*(16) = 6.36, *SE* = 6.65, *p* < .001  *OFF/ON*: *β* = 5.76, *t*(63) = 1.08, *SE* = 5.35, *p* = .285  *d* = 0.27 | *OFF*: *β* = 50.95, *t*(16) = 9.47, *SE* = 5.38, *p* < .001  *OFF/ON*: *β* = 5.66, *t*(252) = 2.17, *SE* = 2.61, ***p* = .031**  *d* = 0.15 | *OFF*: *β* = 65.68, *t*(10) = 11.71, *SE* = 5.61, *p* < .001  *OFF/ON*: *β* = 2.45, *t*(73) = 0.70, *SE* = 3.50, *p* = .485  *d* = 0.16 |

**Table S2:** Statistical parameters (along with Cohen’s *d* effect sizes) from HLM for the ***rehabilitative effects*** of the Playskin on the outcome variables at hip, chest, and eye level; B = Baseline; B/I = change from Baseline to Intervention; B/PI = change from Baseline to Post-Intervention; statistically significant *p* values in the comparison variables B/I and B/PI are marked in bold

| ***Unimanual contact*** |  |  |
| --- | --- | --- |
|  | Eyes | *B*: *β* = 15.86, *t*(16) = 2.78, *SE* = 5.71, *p* = .014  *B/I*: *β* = 7.87, *t*(220) = 3.26, *SE* = 2.41, ***p* = .001**,*d* = 0.44  *B/PI*: *β* = 13.17, *t*(220) = 4.12, *SE* = 3.20, ***p* < .001**,*d* = 0.56 |
|  | Chest | *B*: *β* = 23.98, *t*(16) = 4.62, *SE* = 5.19, *p* < .001  *B/I*: *β* = 6.61, *t*(218) = 2.10, *SE* = 3.15, ***p* = .037**,*d* = 0.28  *B/PI*: *β* = 20.84, *t*(218) = 5.02, *SE* = 4.15, ***p* < .001**,*d* = 0.68 |
|  | Hips | *B*: *β* = 36.88, *t*(16) = 7.70, *SE* = 4.79, *p* < .001  *B/I*: *β* = 8.09, *t*(218) = 2.40, *SE* = 3.37, ***p* = .017**,*d* = 0.33  *B/PI*: *β* = 13.34, *t*(218) = 3.03, *SE* = 4.40, ***p* = .003**,*d* = 0.41 |
| ***Bimanual contact*** |  |  |
|  | Eyes | *B*: *β* = 3.74, *t*(16) = 1.96, *SE* = 1.91, *p* = .068  *B/I*: *β* = -0.88, *t*(220) = -0.71, *SE* = 1.25, *p* = .482,*d* = 0.10  *B/PI*: *β* = 1.28, *t*(220) = 0.78, *SE* = 1.65, *p* = .439,*d* = 0.11 |
|  | Chest | *B*: *β* = 5.13, *t*(16) = 1.62, *SE* = 3.17, *p* = .125  *B/I*: *β* = 2.74, *t*(218) = 1.38, *SE* = 1.99, *p* = .170,*d* = 0.19  *B/PI*: *β* = 2.89, *t*(218) = 1.11, *SE* = 2.62, *p* = .270,*d* = 0.15 |
|  | Hips | *B*: *β* = 12.49, *t*(16) = 2.93, *SE* = 4.26, *p* = .010  *B/I*: *β* = 0.74, *t*(202) = 0.26, *SE* = 2.92, *p* = .799,*d* = 0.04  *B/PI*: *β* = 8.86, *t*(16) = 1.40, *SE* = 6.32, *p* = .180,*d* = 0.70 |
| ***Ventral contact*** |  |  |
|  | Eyes | *B*: *β* = 17.82, *t*(16) = 2.88, *SE* = 6.19, *p* = .011  *B/I*: *β* = 7.01, *t*(204) = 2.81, *SE* = 2.50, ***p* = .005**,*d* = 0.39  *B/PI*: *β* = 15.56, *t*(16) = 3.75, *SE* = 4.15, ***p* = .002**,*d* = 1.88 |
|  | Chest | *B*: *β* = 26.95, *t*(16) = 4.02, *SE* = 6.70, *p* < .001  *B/I*: *β* = 7.77, *t*(218) = 2.37, *SE* = 3.28, ***p* = .019**,*d* = 0.32  *B/PI*: *β* = 22.60, *t*(218) = 5.23, *SE* = 4.32, ***p* < .001**,*d* = 0.71 |
|  | Hips | *B*: *β* = 44.68, *t*(16) = 5.85, *SE* = 7.64, *p* < .001  *B/I*: *β* = 6.17, *t*(16) = 1.41, *SE* = 4.38, *p* = .178,*d* = 0.71  *B/PI*: *β* = 21.13, *t*(16) = 3.20, *SE* = 6.61, ***p* = .006**,*d* = 1.60 |
| ***Open-handed contact*** |  |  |
|  | Eyes | *B*: *β* = 19.24, *t*(16) = 2.92, *SE* = 6.59, *p* = .010  *B/I*: *β* = 6.80, *t*(204) = 2.80, *SE* = 2.43, ***p* = .006**,*d* = 0.39  *B/PI*: *β* = 14.44, *t*(16) = 3.29, *SE* = 4.39, ***p* = .005**,*d* = 1.65 |
|  | Chest | *B*: *β* = 28.76, *t*(16) = 4.44, *SE* = 6.48, *p* < .001  *B/I*: *β* = 9.43, *t*(218) = 2.83, *SE* = 3.33, ***p* = .005**,*d* = 0.38  *B/PI*: *β* = 23.81, *t*(218) = 5.42, *SE* = 4.39, ***p* < .001**,*d* = 0.73 |
|  | Hips | *B*: *β* = 49.21, *t*(16) = 8.07, *SE* = 6.10, *p* < .001  *B/I*: *β* = 8.62, *t*(218) = 2.49, *SE* = 3.46, ***p* = .013**,*d* = 0.34  *B/PI*: *β* = 22.03, *t*(218) = 4.88, *SE* = 4.52, ***p* < .001**,*d* = 0.66 |
| ***Looking at the toy*** |  |  |
|  | Eyes | *B*: *β* = 63.52, *t*(16) = 15.97, *SE* = 3.98, *p* < .001  *B/I*: *β* = -2.24, *t*(204) = -0.61, *SE* = 3.68, *p* = .544,*d* = 0.09  *B/PI*: *β* = 4.05, *t*(16) = 0.66, *SE* = 6.14, *p* = .519,*d* = 0.33 |
|  | Chest | *B*: *β* = 66.40, *t*(16) = 18.64, *SE* = 3.56, *p* < .001  *B/I*: *β* = 4.70, *t*(218) = 1.34, *SE* = 3.51, *p* = .182,*d* = 0.18  *B/PI*: *β* = 11.74, *t*(218) = 2.55, *SE* = 4.60, ***p* = .011**,*d* = 0.35 |
|  | Hips | *B*: *β* = 69.39, *t*(16) = 20.04, *SE* = 3.46, *p* < .001  *B/I*: *β* = 4.60, *t*(218) = 1.21, *SE* = 3.80, *p* = .228,*d* = 0.16  *B/PI*: *β* = 6.74, *t*(218) = 1.37, *SE* = 4.92, *p* = .173,*d* = 0.19 |
| ***Looking during unimanual contact*** | |  |
|  | Eyes | *B*: *β* = 11.93, *t*(16) = 2.67, *SE* = 4.47, *p* = .017  *B/I*: *β* = 5.58, *t*(220) = 2.58, *SE* = 2.16, ***p* = .011**,*d* = 0.35  *B/PI*: *β* = 9.27, *t*(220) = 3.24, *SE* = 2.86, ***p* = .001**,*d* = 0.44 |
|  | Chest | *B*: *β* = 18.09, *t*(16) = 4.02, *SE* = 4.50, *p* < .001  *B/I*: *β* = 6.71, *t*(16) = 1.69, *SE* = 3.96, *p* = .110,*d* = 0.85  *B/PI*: *β* = 18.38, *t*(16) = 3.39, *SE* = 5.43, ***p* = .004**,*d* = 1.70 |
|  | Hips | *B*: *β* = 27.05, *t*(16) = 6.65, *SE* = 4.07, *p* < .001  *B/I*: *β* = 9.10, *t*(218) = 2.75, *SE* = 3.31, ***p* = .007**,*d* = 0.37  *B/PI*: *β* = 12.60, *t*(218) = 2.92, *SE* = 4.32, ***p* = .004**,*d* = 0.40 |
| ***Looking during bimanual contact*** | |  |
|  | Eyes | *B*: *β* = 3.49, *t*(16) = 2.10, *SE* = 1.66, *p* = .052  *B/I*: *β* = -1.43, *t*(220) = -1.36, *SE* = 1.06, *p* = .175,*d* = 0.18  *B/PI*: *β* = 0.79, *t*(220) = 0.56, *SE* = 1.40, *p* = .574,*d* = 0.08 |
|  | Chest | *B*: *β* = 3.11, *t*(202) = 2.45, *SE* = 1.27, *p* = .015  *B/I*: *β* = 2.93, *t*(16) = 0.93, *SE* = 3.14, *p* = .365,*d* = 0.47  *B/PI*: *β* = 2.86, *t*(16) = 0.75, *SE* = 3.81, *p* = .464,*d* = 0.38 |
|  | Hips | *B*: *β* = 10.44, *t*(16) = 2.89, *SE* = 3.61, *p* = .011  *B/I*: *β* = 0.17, *t*(202) = 0.07, *SE* = 2.40, *p* = .943,*d* = 0.01  *B/PI*: *β* = 6.95, *t*(16) = 1.36, *SE* = 5.10, *p* = .192,*d* = 0.68 |
| ***Bouts of exploration*** |  |  |
|  | Eyes | *B*: *β* = 19.12, *t*(16) = 6.44, *SE* = 2.97, *p* < .001  *B/I*: *β* = 2.33, *t*(220) = 1.53, *SE* = 1.52, *p* = .128,*d* = 0.21  *B/PI*: *β* = 7.72, *t*(220) = 3.83, *SE* = 2.02, ***p* < .001**,*d* = 0.52 |
|  | Chest | *B*: *β* = 23.12, *t*(16) = 8.33, *SE* = 2.78, *p* < .001  *B/I*: *β* = 1.39, *t*(202) = 0.80, *SE* = 1.73, *p* = .425,*d* = 0.11  *B/PI*: *β* = 10.04, *t*(16) = 2.40, *SE* = 4.19, ***p* = .029**,*d* = 1.20 |
|  | Hips | *B*: *β* = 21.22, *t*(16) = 7.61, *SE* = 2.79, *p* < .001  *B/I*: *β* = 4.15, *t*(218) = 2.47, *SE* = 1.68, ***p* = .014**,*d* = 0.33  *B/PI*: *β* = 6.38, *t*(218) = 2.91, *SE* = 2.20, ***p* = .004**,*d* = 0.39 |
| ***Combined behaviors*** |  |  |
|  | Eyes | *B*: *β* = 19.23, *t*(16) = 3.61, *SE* = 5.32, *p* = .002  *B/I*: *β* = 3.96, *t*(220) = 1.59, *SE* = 2.49, *p* = .113,*d* = 0.21  *B/PI*: *β* = 9.12, *t*(220) = 2.77, *SE* = 3.29, ***p* = .006**,*d* = 0.37 |
|  | Chest | *B*: *β* = 26.86, *t*(16) = 5.03, *SE* = 5.34, *p* < .001  *B/I*: *β* = 8.72, *t*(218) = 2.68, *SE* = 3.25, ***p* = .008**,*d* = 0.36  *B/PI*: *β* = 20.72, *t*(218) = 4.83, *SE* = 4.29, ***p* < .001**,*d* = 0.65 |
|  | Hips | *B*: *β* = 40.45, *t*(16) = 7.02, *SE* = 5.76, *p* < .001  *B/I*: *β* = 9.79, *t*(218) = 2.73, *SE* = 3.59, ***p* = .007**,*d* = 0.37  *B/PI*: *β* = 20.33, *t*(218) = 4.34, *SE* = 4.69, ***p* < .001**,*d* = 0.59 |

**Figure 1S:** Summarized observed data comparing infants’ performance with (ON) and without (OFF) the Playskin during Baseline, Intervention, and Post-Intervention for each level of object presentation; * marks statistically significant effects (*p* ≤ .05); † marks marginally significant effects (*p* ≤ .10).

†

*

*

*

†

*

*

*

*

*

*

†


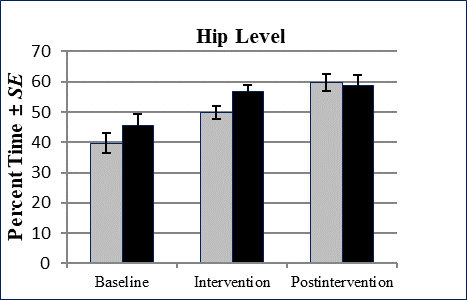

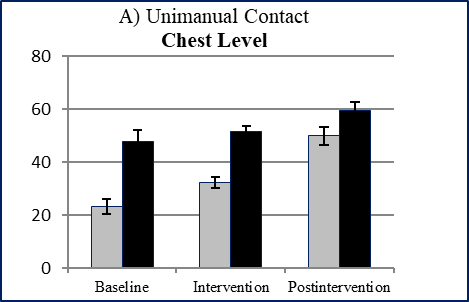

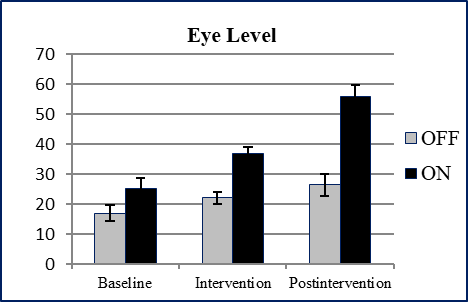

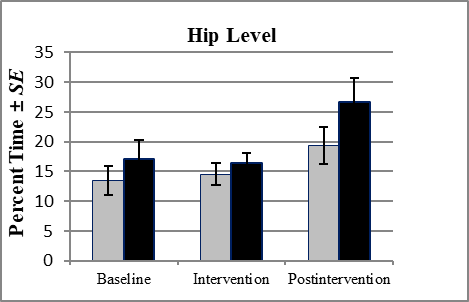

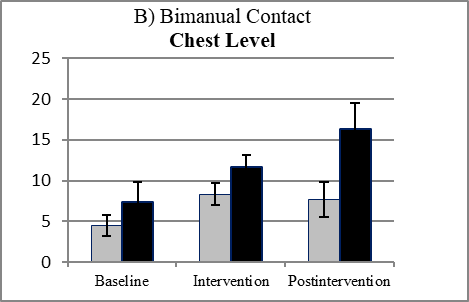

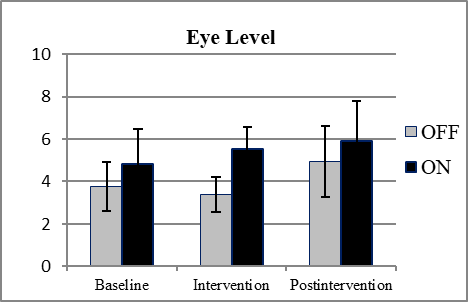

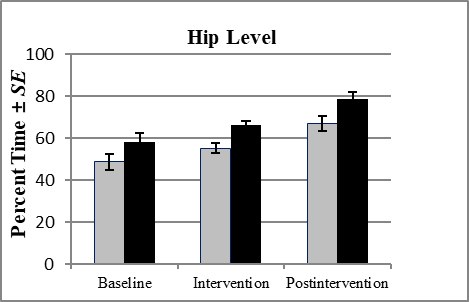

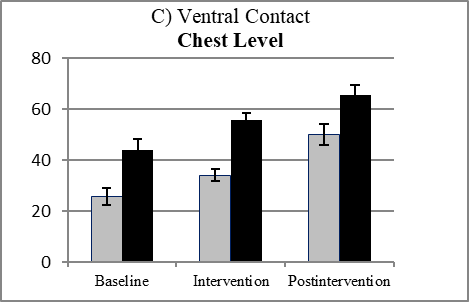

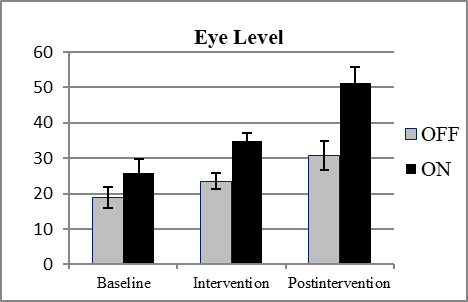

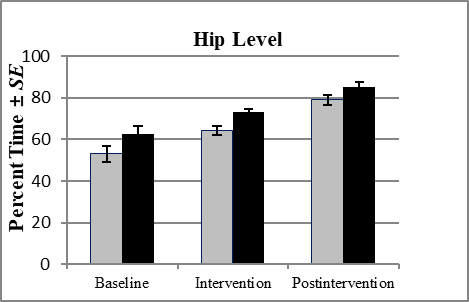

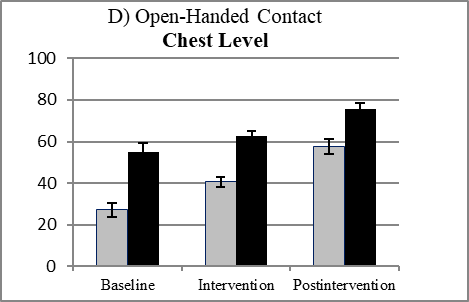

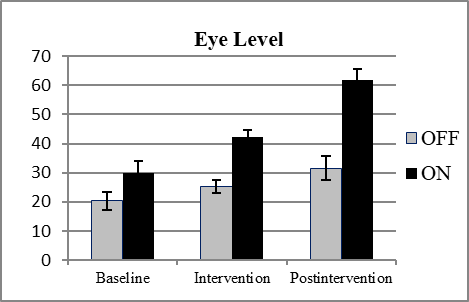

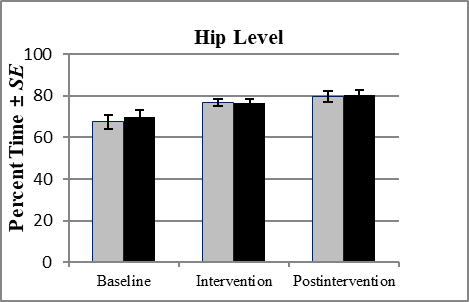

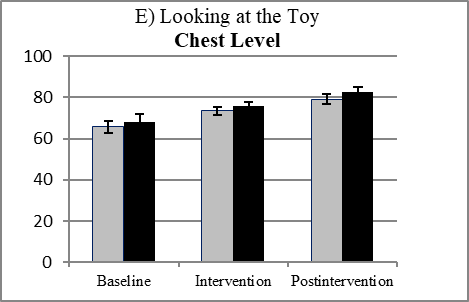

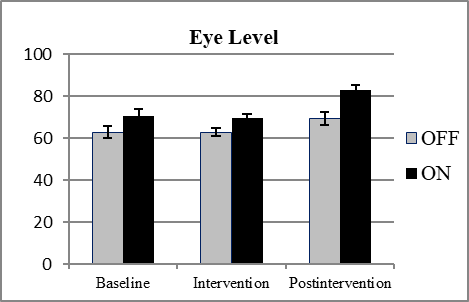

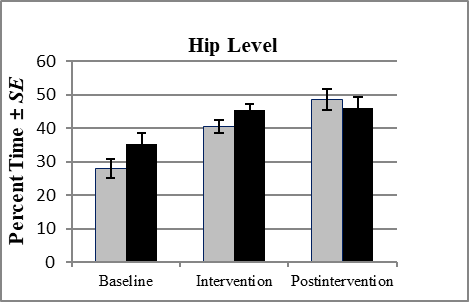

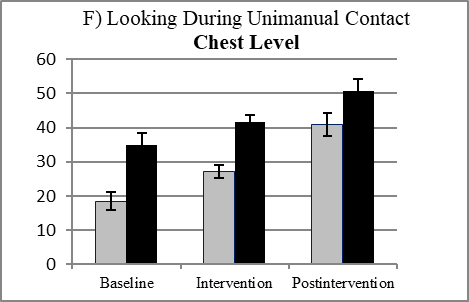

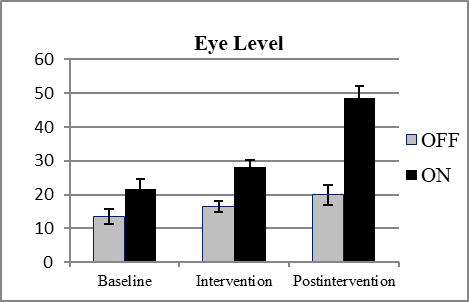


*

*

*

*

*

*

*

*

*

*

*

*

*

*

*

*

*

*

*

*

*

*

*

*

*

†

†

†


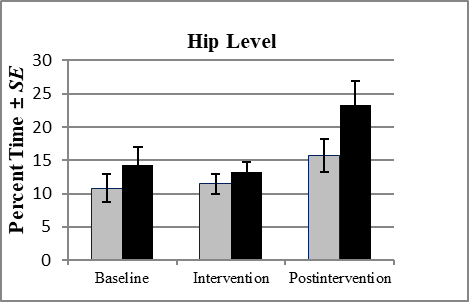

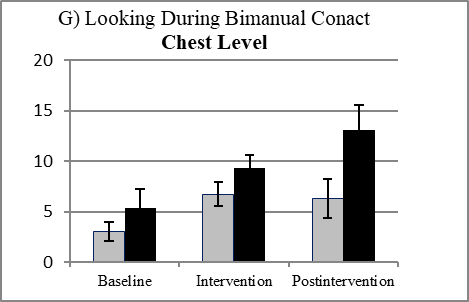

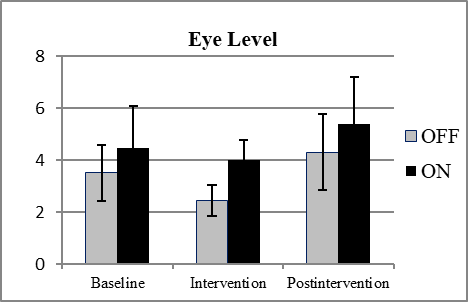

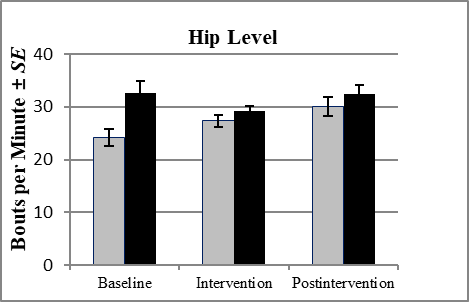

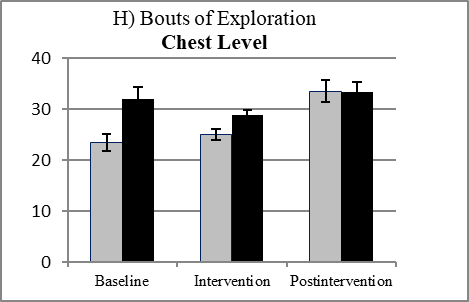

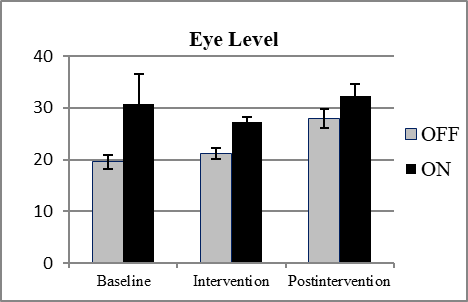

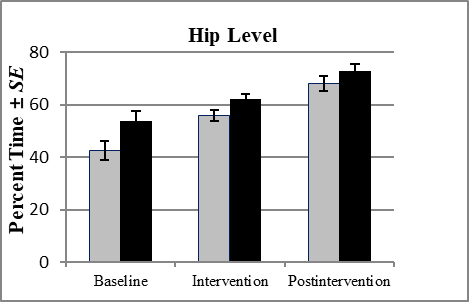

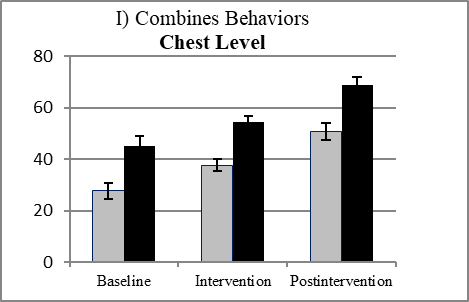

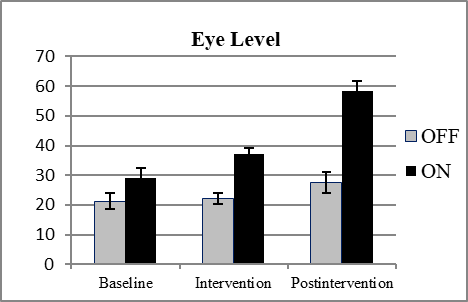

Supplement: 7501205110p1_ds001.docx [file 7501205110p1_ds001.docx]
